# Supplementary material
Source: PubMed Central journal article supplement (PMC3820923)
Supplement: supp_M112.026476_mcp.M112.026476-1.pdf [file supp_M112.026476_mcp.M112.026476-1.pdf]

**Supplemental Table 1.** Protein accession numbers of ADAM proteins used to construct the molecular phylogenetic tree in Figure 3.

| <b>Protein</b> | <b>Species</b>               | <b>NCBI Accession</b> |
|----------------|------------------------------|-----------------------|
| ADAM3          | <i>Mus musculus</i>          | NP_033749             |
|                | <i>Rattus norvegicus</i>     | NP_064698             |
| ADAM4          | <i>Mus musculus</i> (ADAM4a) | NP_033750             |
|                | <i>Mus musculus</i> (ADAM4b) | NP_00034084           |
|                | <i>Rattus norvegicus</i>     | NP_064701             |
| ADAM6          | <i>Mus musculus</i> (ADAM6a) | NP_777479             |
|                | <i>Mus musculus</i> (ADAM6b) | NP_001009545          |
|                | <i>Rattus norvegicus</i>     | NP_620261             |
| ADAM18         | <i>Homo sapiens</i>          | NP_055052             |
|                | <i>Macaca mulatta</i>        | XP_002805364          |
|                | <i>Mus musculus</i>          | NP_034214             |
|                | <i>Pan troglodytes</i>       | XP_519721             |
| ADAM20         | <i>Homo sapiens</i>          | NP_003805             |
|                | <i>Macaca mulatta</i>        | XP_002805167          |
|                | <i>Pan troglodytes</i>       | XP_522893             |
| ADAM21         | <i>Homo sapiens</i>          | NP_003804             |
|                | <i>Macaca mulatta</i>        | NP_001181251          |
|                | <i>Mus musculus</i>          | NP_065063             |
|                | <i>Pan troglodytes</i>       | XP_001145699          |
|                |                              |                       |
| ADAM18-like    | <i>Macaca mulatta</i>        | XP_002805363          |
| ADAM20-like    | <i>Macaca mulatta</i>        | XP_001111189          |
| ADAM21-like    | <i>Macaca mulatta</i>        | XP_001088316          |
