# Supplementary material
Source: PubMed Central journal article supplement (PMC3820923)
Supplement: supp_M112.026476_mcp.M112.026476-5.pdf [file supp_M112.026476_mcp.M112.026476-5.pdf]

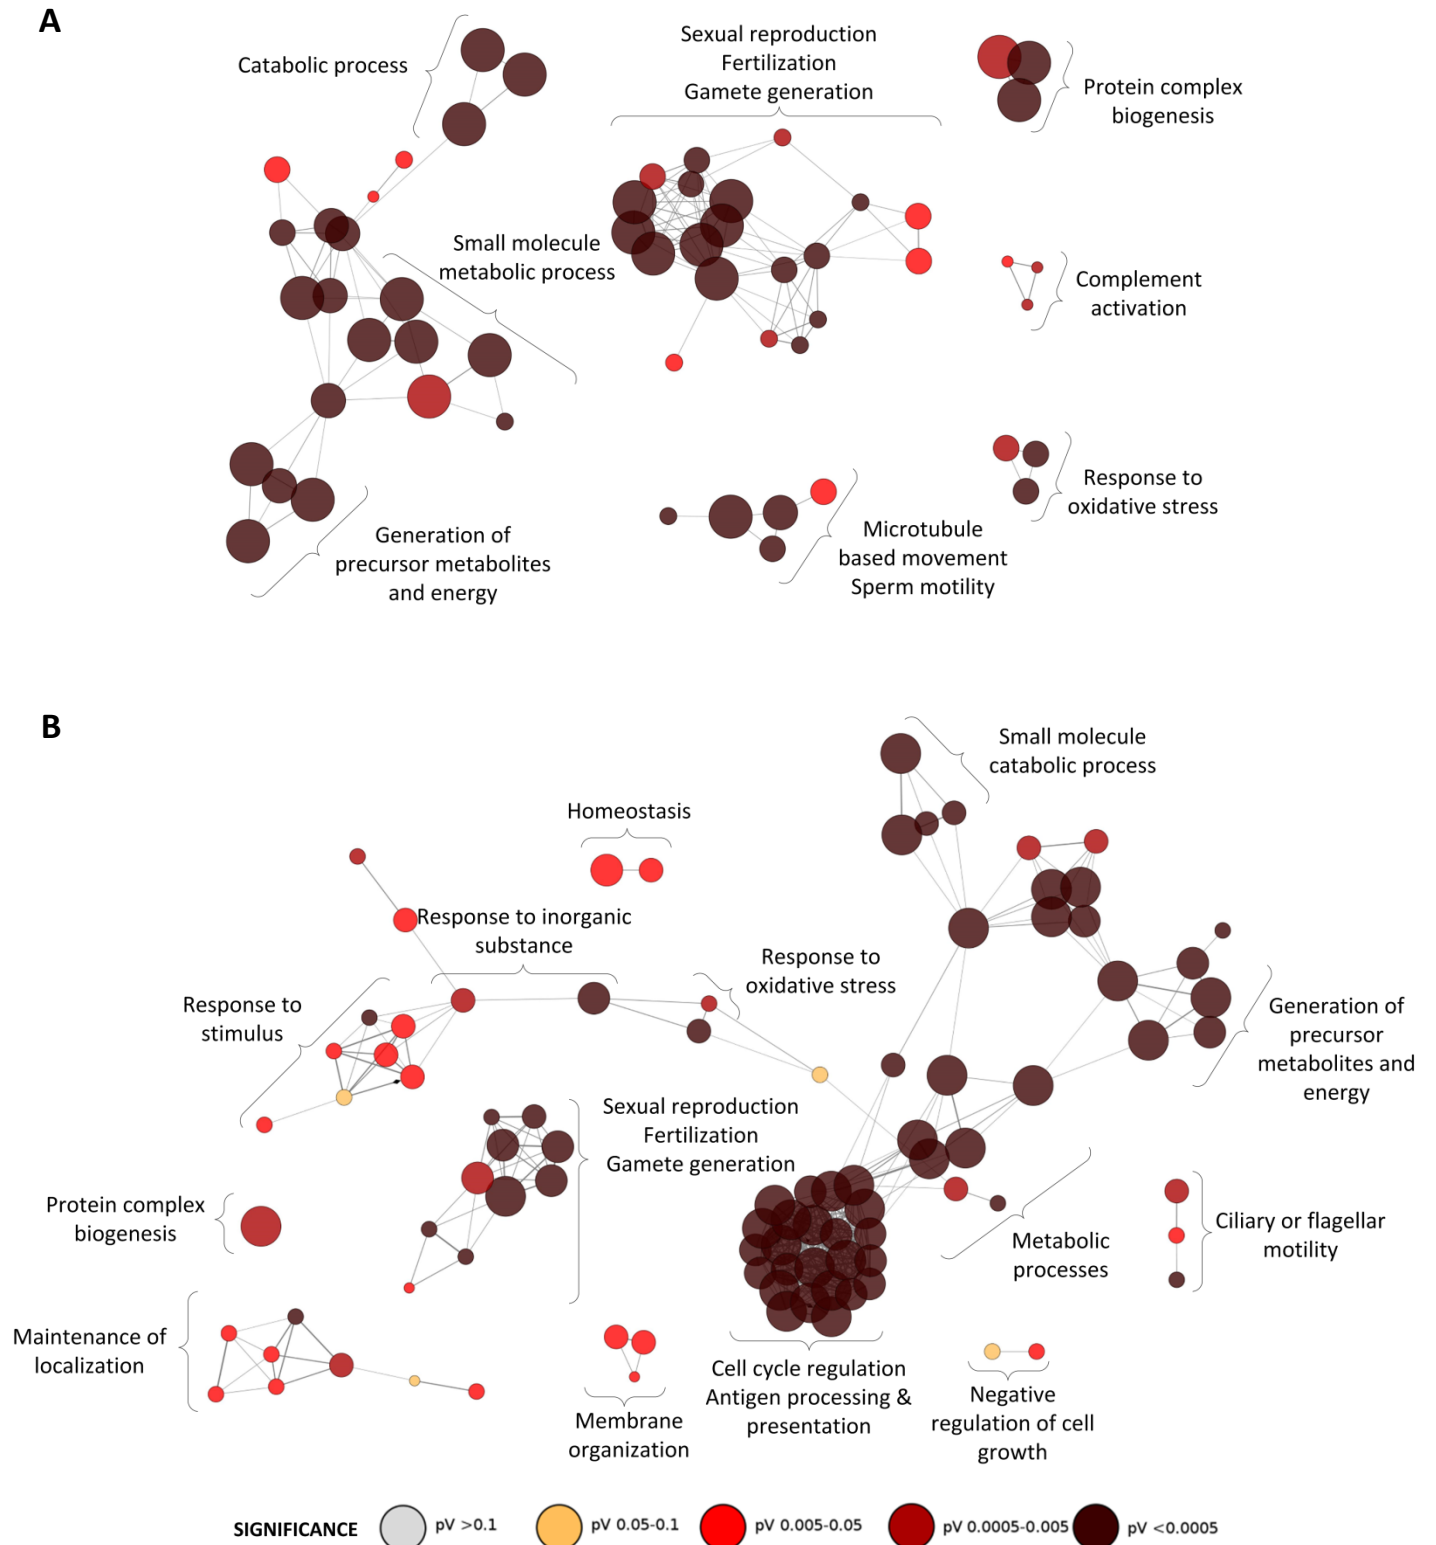

**Supplemental Figure 1.** (A) Biological process network showing enriched functional categories for proteins found in both the macaque and mouse sperm proteomes. (B) Biological process network showing enriched functional categories for proteins found in both the macaque and human sperm proteomes.
